# Supplementary material
Source: HighWire-hosted journal article supplement (https://bmjopen.bmj.com/content/11/7/e048540)

Appendix 1. Age distribution by hospital level.

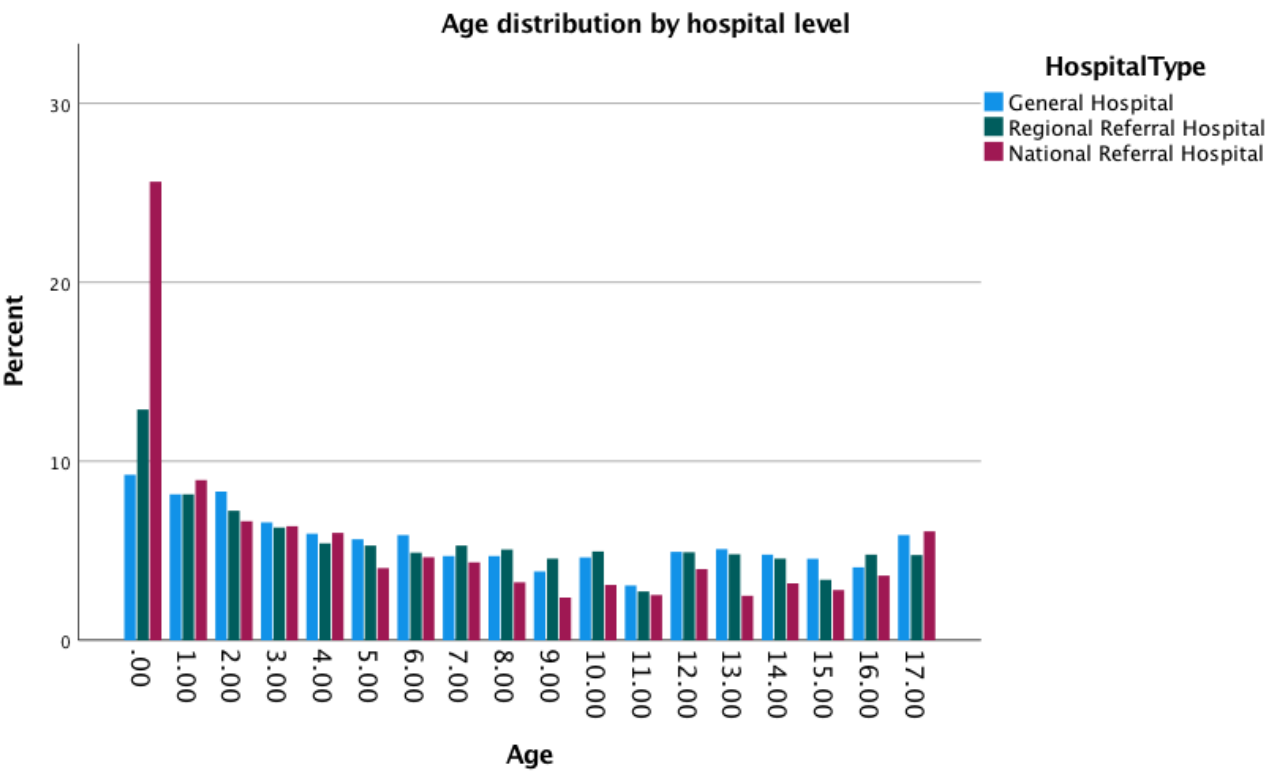

Supplement: inline-supplementary-material-1 [file inline-supplementary-material-1.pdf]
